# Supplementary material for: Removing structural water from sodium titanate anodes towards barrier-free ion diffusion for sodium ion batteries
Source: Royal Society of Chemistry journal article supplement (doi:10.1039/c7ta05217k), 2017-01-01
Supplement: c7ta05217k1.pdf [file c7ta05217k1.pdf]

## Electronic Supplementary Information

### **Removing structural water from sodium titanate anode towards barrier-free ion diffusion for sodium ion batteries**

Qing Zhang,<sup>a</sup> Tianqi Zhang,<sup>a</sup> Yaqing Wei,<sup>a</sup> Tianyou Zhai,<sup>a</sup> Huiqiao Li\*<sup>a, b</sup>

<sup>a</sup> State Key Laboratory of Material Processing and Die & Mould Technology, School of Materials Science and Engineering, Huazhong University of Science and Technology (HUST), Wuhan 430074, Hubei, P. R. China. E-mail: hqli@hust.edu.cn;

<sup>b</sup> Key Laboratory of Advanced Energy Materials Chemistry (Ministry of Education), Nankai University, Tianjin 300071, P. R. China

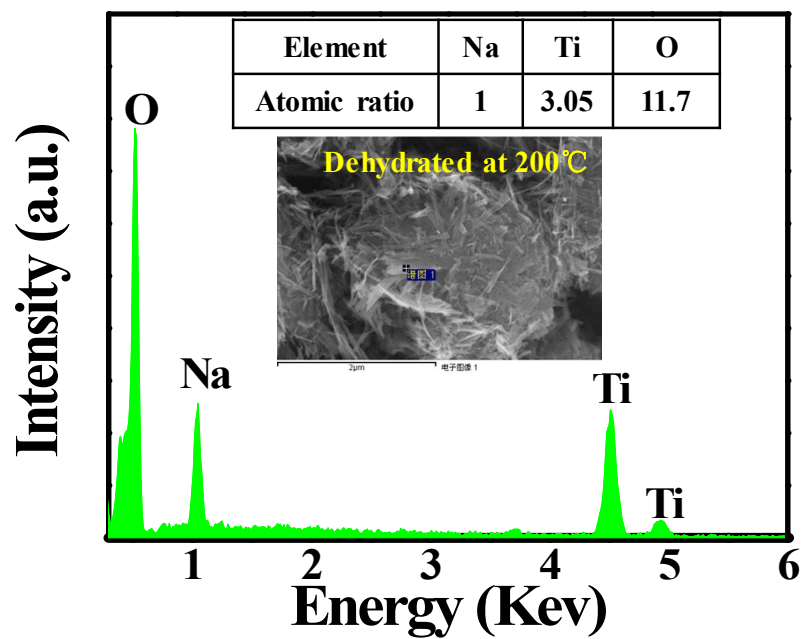

Figure S1 EDX of  $\text{NaTi}_3\text{O}_6(\text{OH}) \cdot 2\text{H}_2\text{O}$  sample after dehydrated at 200 °C.

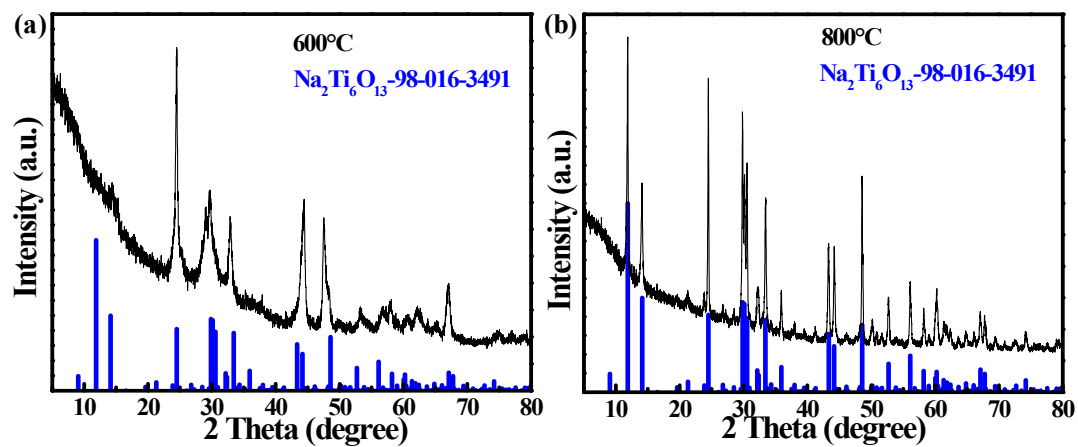

Figure S2 XRD patterns of  $\text{NaTi}_3\text{O}_6(\text{OH}) \cdot 2\text{H}_2\text{O}$  sample after heated at (a) 600 and (b) 800 °C.

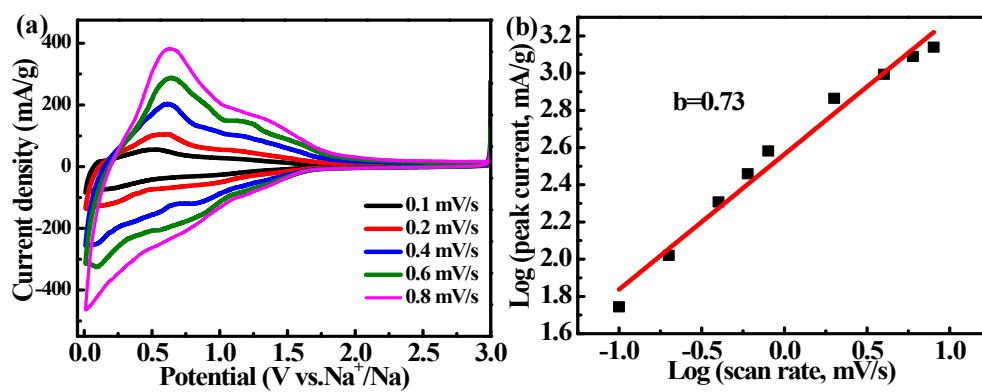

**Figure S3** (a) CV curves at different scan rates, (b) relationship between logarithm oxidative peak current and logarithm scan rates of as-prepared  $\text{NaTi}_3\text{O}_6(\text{OH}) \cdot 2\text{H}_2\text{O}$  nanowires.

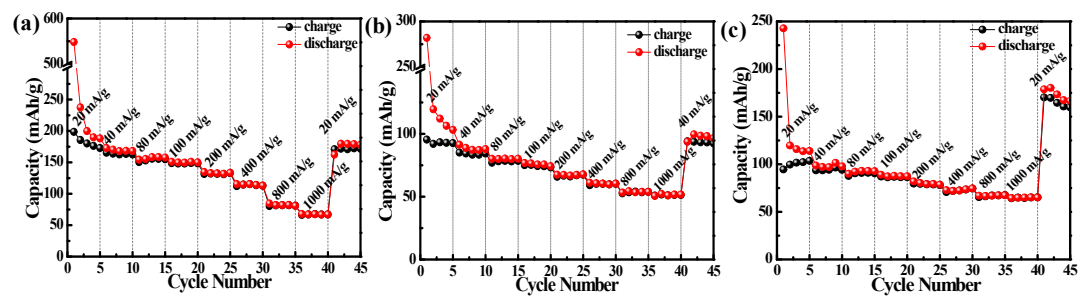

**Figure S4** Rate performance of  $\text{NaTi}_3\text{O}_6(\text{OH}) \cdot 2\text{H}_2\text{O}$  sample (a) before and after heated at (b) 600, (c) 800 °C.

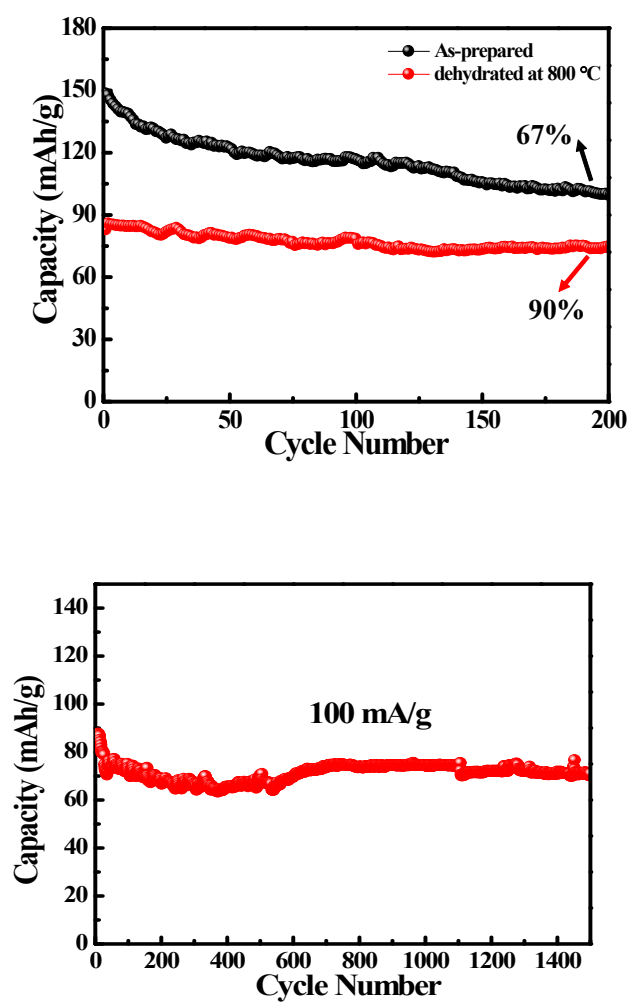

**Figure S5** Cycling performance comparison of NTO sample before and after dehydrated at 800 °C at the current density of 100 mA/g (up); long cycle performance of NTO sample dehydrated at 800°C at 100 mA/g (down).

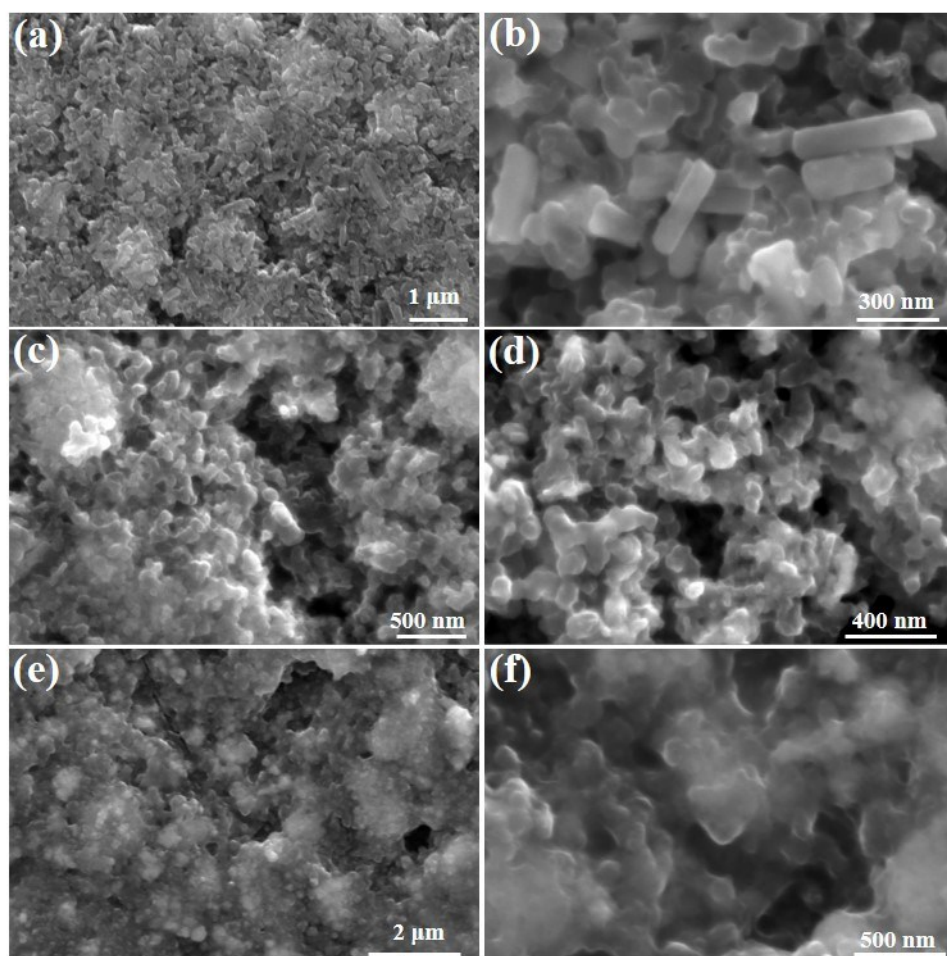

**Figure S6** SEM images of sample (a, b) dedhydrated at 800 °C, (c, d) dedhydrated at 600 °C, (e, f) as-prepared sample after 50 cycles.

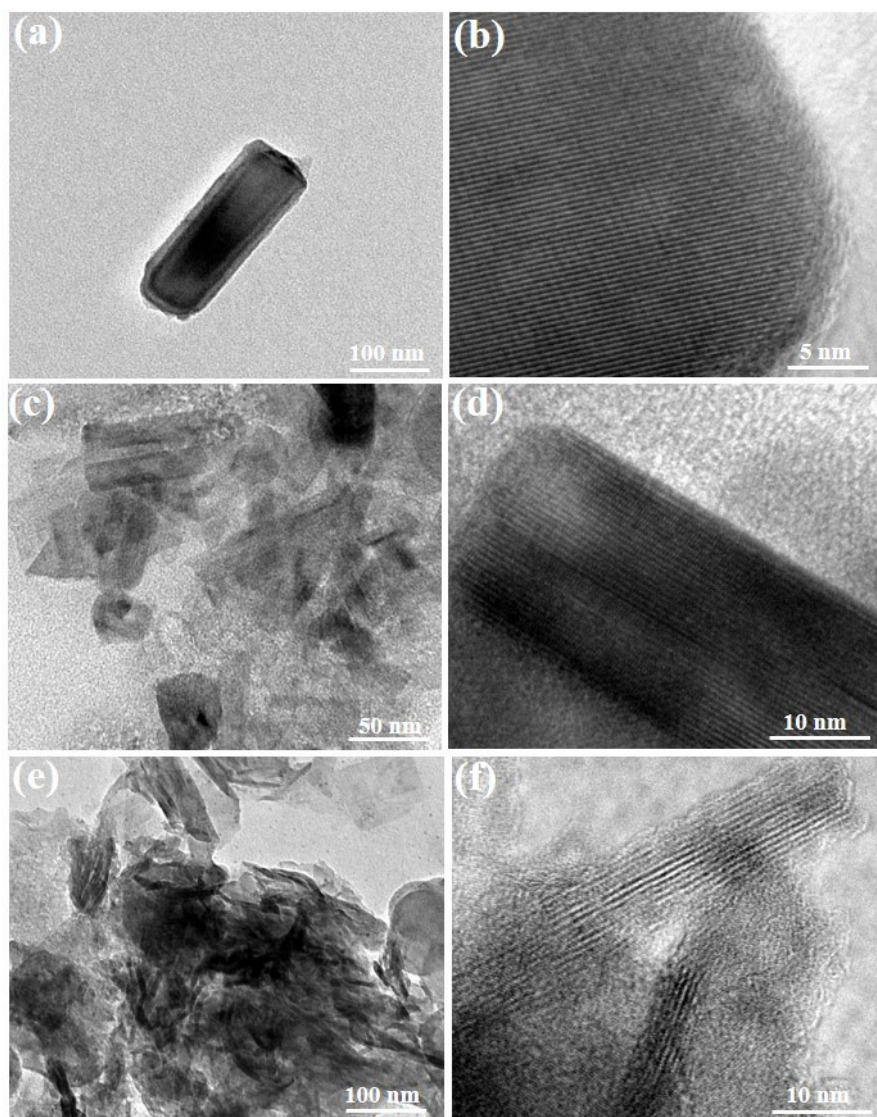

**Figure S7** TEM and HRTEM images of sample (a, b) dedhydrated at 800 °C, (c, d) dedhydrated at 600 °C, (e, f) as-prepared sample after 50 cycles.
